# Supplementary material for: Púrpura Trombocitopénica Idiopática: Controversias
Source: Springer Nature journal article supplement (doi:10.1186/s12959-021-00341-3), 2001-01-01
Supplement: MOESM1 [file 19876668]

**Supplementary Table 1. Physiological, hematological, and lifestyle parameters of the study subjects.**

| Physiological and hematological parameters    | Mean $\pm$ SD       | Minimum | Maximum | Spearman's rho |
|-----------------------------------------------|---------------------|---------|---------|----------------|
| Age (years)                                   | 28.55 $\pm$ 6.51    | 20      | 45      | -.040          |
| Body mass index (kg/m <sup>2</sup> )          | 21.74 $\pm$ 2.66    | 15.8    | 29.5    | .217           |
| Systolic blood pressure (mmHg)                | 113.76 $\pm$ 8.35   | 92      | 132     | .185           |
| Diastolic blood pressure (mmHg)               | 64.09 $\pm$ 6.93    | 42      | 82      | -.004          |
| Pulse pressure (mmHg)                         | 49.67 $\pm$ 6.675   | 31      | 69      | .251           |
| Pulse rate (bpm)                              | 61.70 $\pm$ 8.43    | 42      | 87      | .099           |
| Total bilirubin (mg/dL)                       | 0.93 $\pm$ 0.35     | 0.38    | 2.37    | -.081          |
| Direct bilirubin (mg/dL)                      | 0.06 $\pm$ 0.02     | 0.02    | 0.13    | .115           |
| Alkaline phosphatase (IU/L)                   | 172.45 $\pm$ 50.27  | 39      | 318     | -.039          |
| Aspartate aminotransferase (IU/L)             | 18.22 $\pm$ 4.88    | 10      | 43      | .072           |
| Alanine aminotransferase (IU/L)               | 18.016 $\pm$ 13.52  | 5       | 125     | .233           |
| Lactate dehydrogenase (IU/L)                  | 154.51 $\pm$ 23.03  | 102     | 230     | -.002          |
| $\gamma$ -glutamyl transpeptidase (IU/L)      | 23.14 $\pm$ 20.00   | 7       | 167     | .136           |
| Total protein (g/dL)                          | 7.02 $\pm$ 0.40     | 6.2     | 8.1     | .112           |
| Albumin (g/dL)                                | 4.68 $\pm$ 0.32     | 3.8     | 5.5     | .106           |
| Globulin (g/dL)                               | 2.35 $\pm$ 0.35     | 1.6     | 3.6     | 0.049          |
| Creatine phosphokinase (IU/L)                 | 114.73 $\pm$ 124.32 | 43      | 1353    | .038           |
| Amylase (IU/L)                                | 75.26 $\pm$ 24.01   | 28      | 169     | .042           |
| Glucose (mg/dL)                               | 88.85 $\pm$ 7.61    | 74      | 132     | -.046          |
| Low-density lipoprotein cholesterol (mg/dL)   | 104.22 $\pm$ 23.87  | 54      | 193     | .111           |
| High-density lipoprotein cholesterol (mg/dL)  | 63.88 $\pm$ 13.99   | 35      | 111     | -.152          |
| Triglycerides (mg/dL)                         | 79.43 $\pm$ 49.45   | 27      | 327     | .080           |
| Total cholesterol (mg/dL)                     | 183.98 $\pm$ 27.66  | 120     | 270     | 0.048          |
| Urea nitrogen (mg/dL)                         | 11.86 $\pm$ 2.88    | 6.8     | 19.7    | .009           |
| Creatinine (mg/dL)                            | 0.72 $\pm$ 0.13     | 0.4     | 0.97    | .139           |
| Uric acid ( $\mu$ mol/L)                      | 5.42 $\pm$ 1.40     | 1.6     | 8.5     | .118           |
| Na (mEq/L)                                    | 139.11 $\pm$ 1.22   | 136     | 142     | -.048          |
| K (mEq/L)                                     | 4.04 $\pm$ 0.23     | 3.6     | 4.7     | .322           |
| Cl (mEq/L)                                    | 102.46 $\pm$ 2.04   | 99      | 108     | -.054          |
| White blood cells (10 <sup>3</sup> / $\mu$ L) | 5.77 $\pm$ 1.57     | 3.1     | 10.6    | .385           |
| Hematocrit (%)                                | 44.40 $\pm$ 4.17    | 34.6    | 55.2    | .306           |

|                                           |                    |      |      |       |
|-------------------------------------------|--------------------|------|------|-------|
| Platelets ( $10^3/\mu\text{L}$ )          | $237.7 \pm 4.7$    | 148  | 352  | .479  |
| Lymphocytes ( $10^3/\mu\text{L}$ )        | $1.67 \pm 0.41$    | 0.74 | 3.08 | .197  |
| Neutrophils ( $10^3/\mu\text{L}$ )        | $3.57 \pm 1.31$    | 1.65 | 8.27 | .365  |
| Eosinophils ( $/\mu\text{L}$ )            | $178 \pm 134$      | 18.4 | 624  | .065  |
| Basophils ( $/\mu\text{L}$ )              | $36 \pm 17$        | 8.4  | 81.9 | .165  |
| Monocytes ( $/\mu\text{L}$ )              | $316 \pm 98$       | 128  | 706  | .411  |
| Prothrombin time (s)                      | $14.54 \pm 0.89$   | 12.2 | 16.9 | -.184 |
| Activated partial thromboplastin time (s) | $37.52 \pm 4.44$   | 27.9 | 55.1 | .060  |
| Fibrinogen (mg/dL)                        | $246.99 \pm 55.48$ | 137  | 573  | .191  |
| D-dimer ( $\mu\text{g}/\text{mL}$ )       | $0.261 \pm 0.197$  | 0.05 | 1.41 | -.021 |

| Lifestyle parameters             | %    |
|----------------------------------|------|
| Female sex                       | 28.5 |
| Three meals a day                | 61   |
| Eating out frequently            | 17.1 |
| More meat than fish              | 84.6 |
| High-vegetable diet              | 8.9  |
| Low-sodium diet                  | 13   |
| Smoking history                  | 51.2 |
| Drinking ( $\geq 5$ days a week) | 9.8  |
| Regular physical activity        | 81.3 |

Mean  $\pm$  standard deviation (SD), minimum, maximum, and correlation coefficient (Spearman's rho) between  $\text{AUC}_{10}$  of the T-TAS and each parameter are shown.
